# Supplementary material for: Radiolytic synthesis of rGO–PEDOT nanohybrids with enhanced functional properties
Source: Royal Society of Chemistry journal article supplement (doi:10.1039/d5qm00775e), 2025-12-10
Supplement: d5qm00775e1.pdf [file d5qm00775e1.pdf]

## Radiolytic Synthesis of rGO-PEDOT Nanohybrids with Enhanced Functional Properties

Souad Abou Zeid.<sup>a,\*</sup> Liran Hu.<sup>a</sup> Rasta Ghasemi.<sup>b</sup> Matthieu Gervais.<sup>c</sup> Jaspreet Kaur Randhawa.<sup>d</sup> Prem Felix Siril<sup>e</sup>

<sup>a</sup> Institut de Chimie Physique, ICP, UMR 8000, CNRS, Université Paris-Saclay, bâtiment 349, Campus d'Orsay, 15 avenue Jean Perrin, 91405 Orsay Cedex, France.

<sup>b</sup> Institut d'Alembert, IDA, ENS Paris-Saclay, 4 avenue des sciences, 91190 Gif-sur-Yvette, France.

<sup>c</sup> Laboratoire Procédés et Ingénierie en Mécanique et Matériaux, PIMM, Arts et Métiers ParisTech, UMR 8006, CNRS, CNAM, HESAM université, 151 boulevard de l'hôpital, 75013 Paris, France.

<sup>d</sup> School of Mechanical and Materials Engineering, Indian Institute of Technology Mandi, Mandi-175005, Himachal Pradesh, India

<sup>e</sup> School of Chemical Sciences, Indian Institute of Technology Mandi, Mandi, Himachal Pradesh-175005, India.

<sup>f</sup> Département Chimie Vivant Santé, EPN 7, Conservatoire National des Arts et Métiers, CNAM, 292 rue Saint-Martin, 75141 Paris Cedex 03, France.

\* Corresponding author. Institut de Chimie Physique, ICP, UMR 8000, CNRS, Université Paris-Saclay, bâtiment 349, Campus d'Orsay, 15 avenue Jean Perrin, 91405 Orsay Cedex, France. E-mail address: samy.remita@universite-paris-saclay.fr (S. Remita), souadabouzeid321@gmail.com (S. Abou Zeid).

and Samy Remita<sup>a,f,\*</sup>

### Supporting information

**Table S1** Nomenclature of Samples Synthesized According to the three different procedures

| Series | Sample Name        | Absorbed dose (kGy) | Initial Composition                                                       | Notes/Description                                 |
|--------|--------------------|---------------------|---------------------------------------------------------------------------|---------------------------------------------------|
| ①      | GO-E (0 kGy)       | 0                   | [GO] = 1.42 g L <sup>-1</sup> , [EDOT] = 10 mM, [IPA] = 0.2 M             | Unirradiated control                              |
|        | rGO-P (20 kGy)     | 20                  |                                                                           | Reduced GO + PEDOT formed                         |
|        | rGO -P (43 kGy)    | 43                  |                                                                           |                                                   |
|        | rGO -P (72 kGy)    | 72                  |                                                                           |                                                   |
|        | rGO -P (100 kGy)   | 100                 |                                                                           |                                                   |
|        | rGO -P (115 kGy)   | 115                 |                                                                           |                                                   |
|        | rGO -P (130 kGy)   | 130                 |                                                                           |                                                   |
|        | rGO -P (160 kGy)   | 160                 |                                                                           |                                                   |
| ②      | GO-P36 (0 kGy)     | 0                   | [GO] = 1.42 g L <sup>-1</sup> , [P36] = 10 mM in monomers, [IPA] = 0.2 M  | Unirradiated control with PEDOT oligomers         |
|        | rGO -P36 (10 kGy)  | 10                  |                                                                           | Reduced GO + PEDOT formed                         |
|        | rGO -P36 (30 kGy)  | 30                  |                                                                           |                                                   |
|        | rGO -P36 (43 kGy)  | 43                  |                                                                           |                                                   |
|        | rGO -P36 (60 kGy)  | 60                  |                                                                           |                                                   |
|        | rGO -P36 (80 kGy)  | 80                  |                                                                           |                                                   |
|        | rGO -P36 (100 kGy) | 100                 |                                                                           |                                                   |
|        | rGO -P36 (120 kGy) | 120                 |                                                                           |                                                   |
| ③      | GO-P72 (0 kGy)     | 0                   | [[GO] = 1.42 g L <sup>-1</sup> , [P72] = 10 mM in monomers, [IPA] = 0.2 M | Unirradiated control with fully polymerized PEDOT |
|        | rGO -P72 (10 kGy)  | 10                  |                                                                           | Reduced GO + PEDOT formed                         |
|        | rGO -P72 (30 kGy)  | 30                  |                                                                           |                                                   |
|        | rGO -P72 (43 kGy)  | 43                  |                                                                           |                                                   |
|        | rGO -P72 (60 kGy)  | 60                  |                                                                           |                                                   |
|        | rGO -P72 (70 kGy)  | 70                  |                                                                           |                                                   |
|        | rGO -P72 (80 kGy)  | 80                  |                                                                           |                                                   |
|        | rGO -P72 (100 kGy) | 100                 |                                                                           |                                                   |

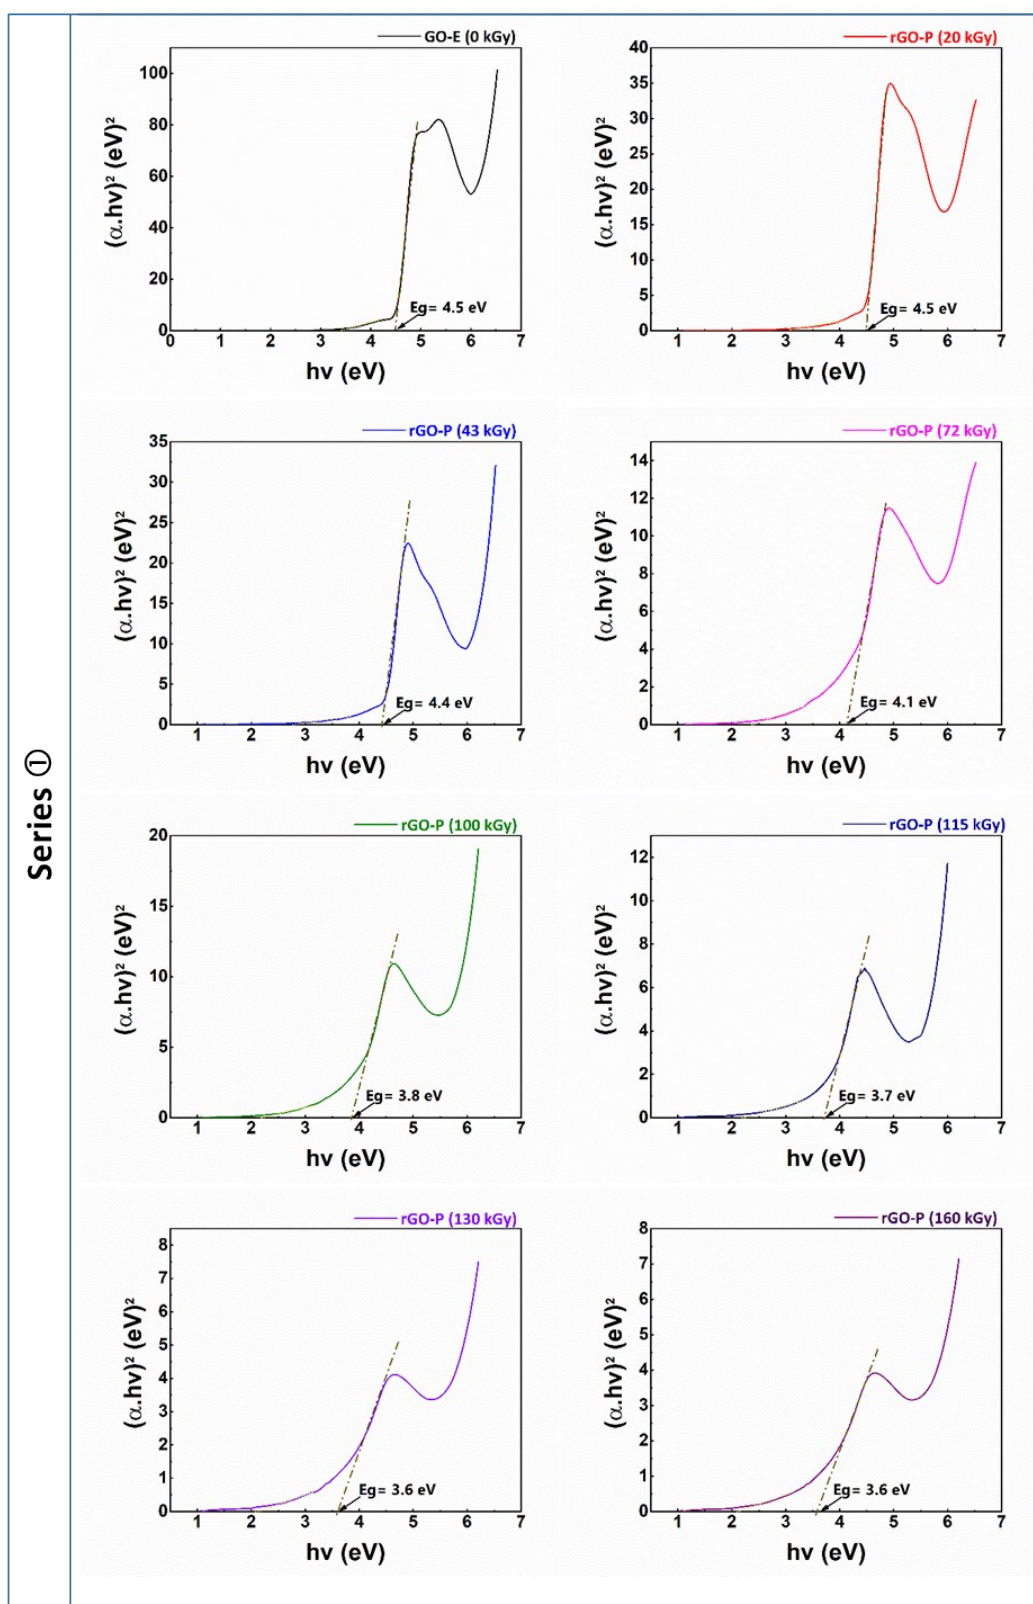

**Figure S1.** Tauc plots for the samples from Series 1 (GO at 1.42 g L<sup>-1</sup> and EDOT at 10 mM) as a function of absorbed dose. The optical bandgap values are determined from the intercept of the linear extrapolation of  $(\alpha h\nu)^2$  with the photon energy axis ( $h\nu$ ) for each sample in Series 1.

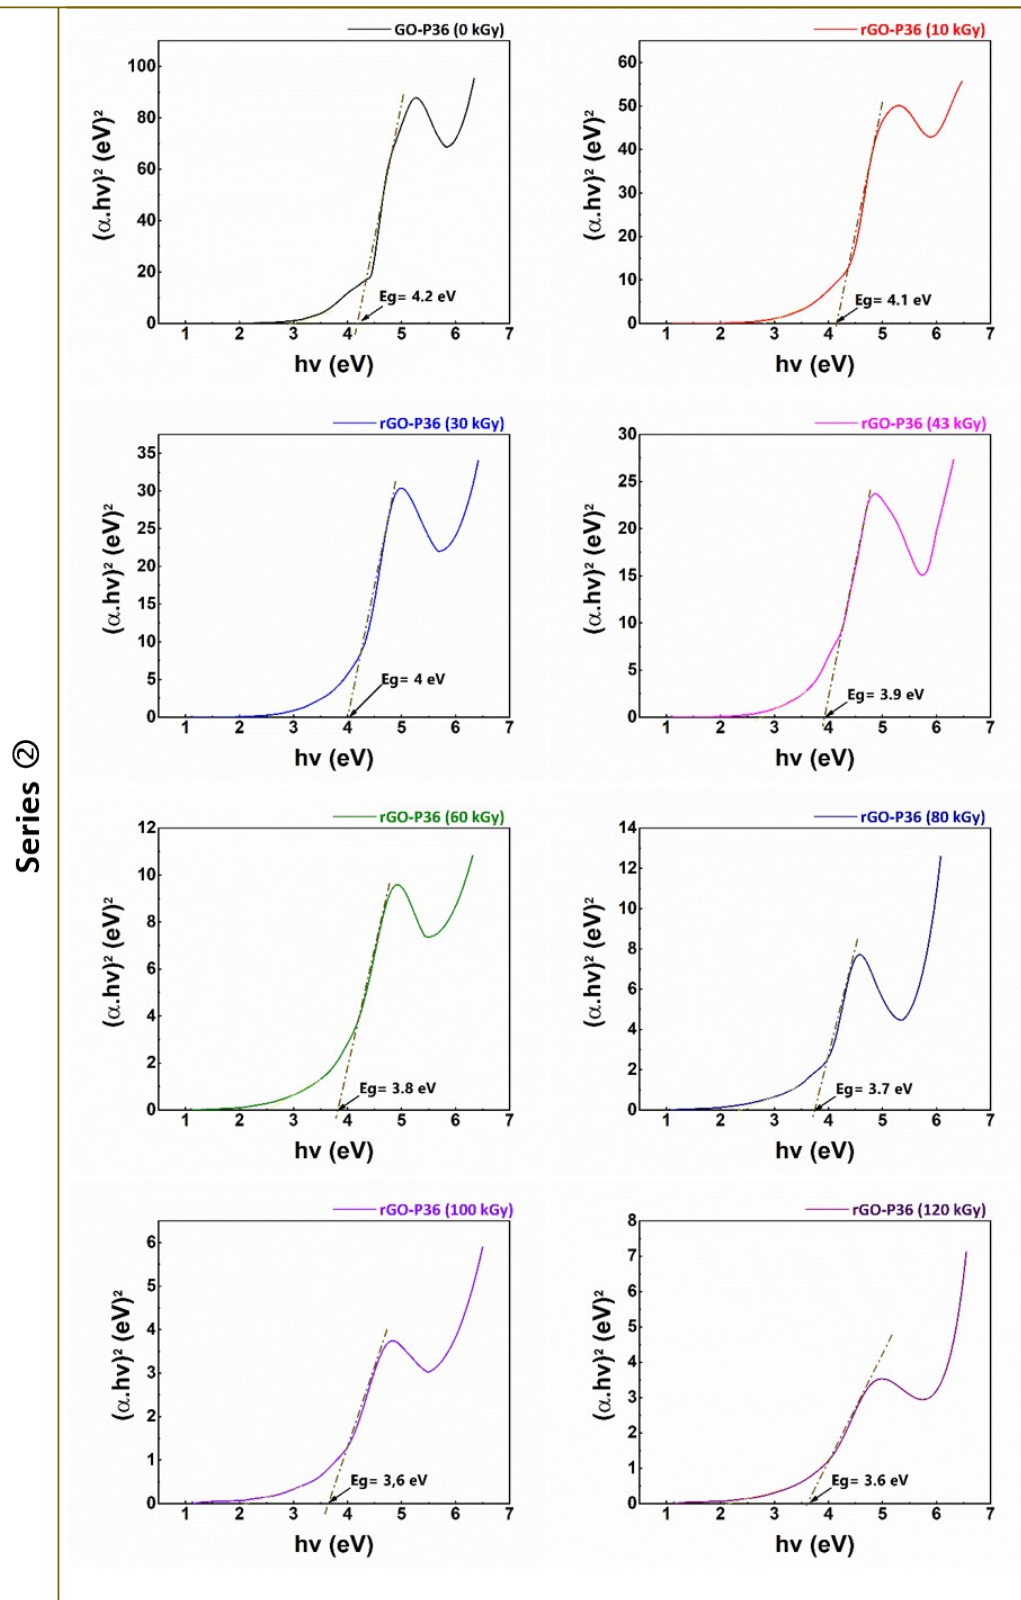

**Figure S2.** Tauc plots for the samples from Series 2 (GO at 1.42 g L<sup>-1</sup> and P36 at 10 mM) as a function of absorbed dose. The optical bandgap values are determined from the intercept of the linear extrapolation of  $(\alpha h\nu)^2$  with the photon energy axis ( $h\nu$ ) for each sample in Series 2.



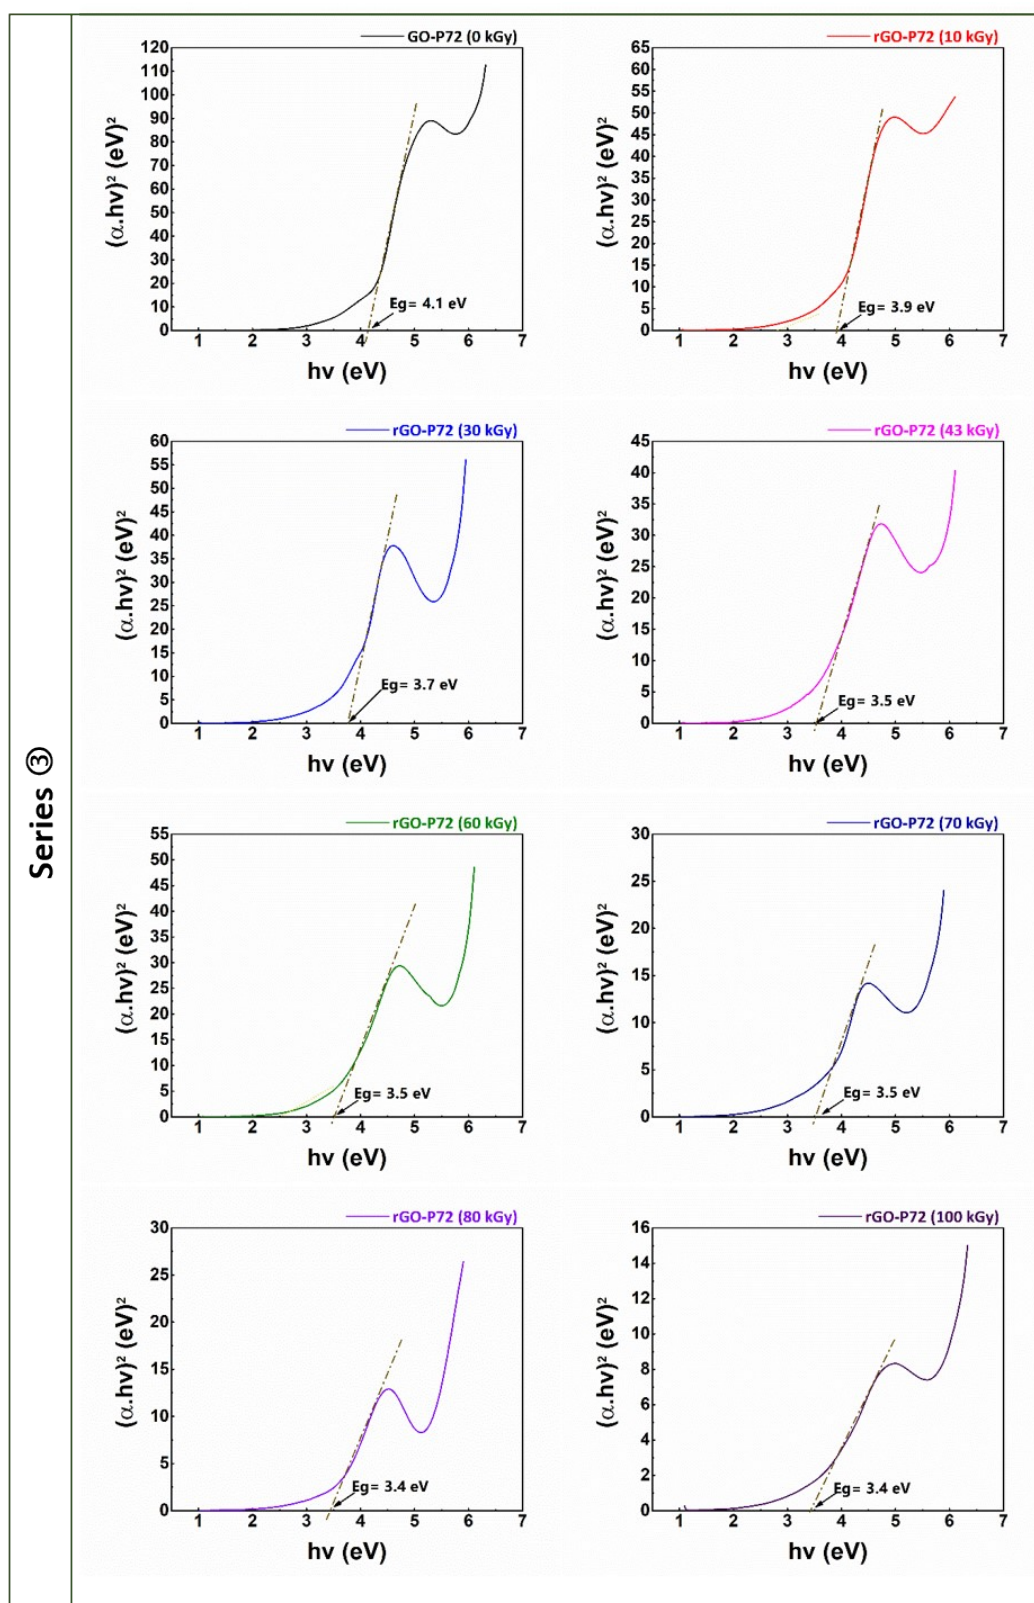

**Figure S3.** Tauc plots for the samples from Series 2 (GO at 1.42 g L<sup>-1</sup> and P72 at 10 mM) as a function of absorbed dose. The optical bandgap values are determined from the intercept of the linear extrapolation of  $(\alpha h\nu)^2$  with the photon energy axis ( $h\nu$ ) for each sample in Series 3.

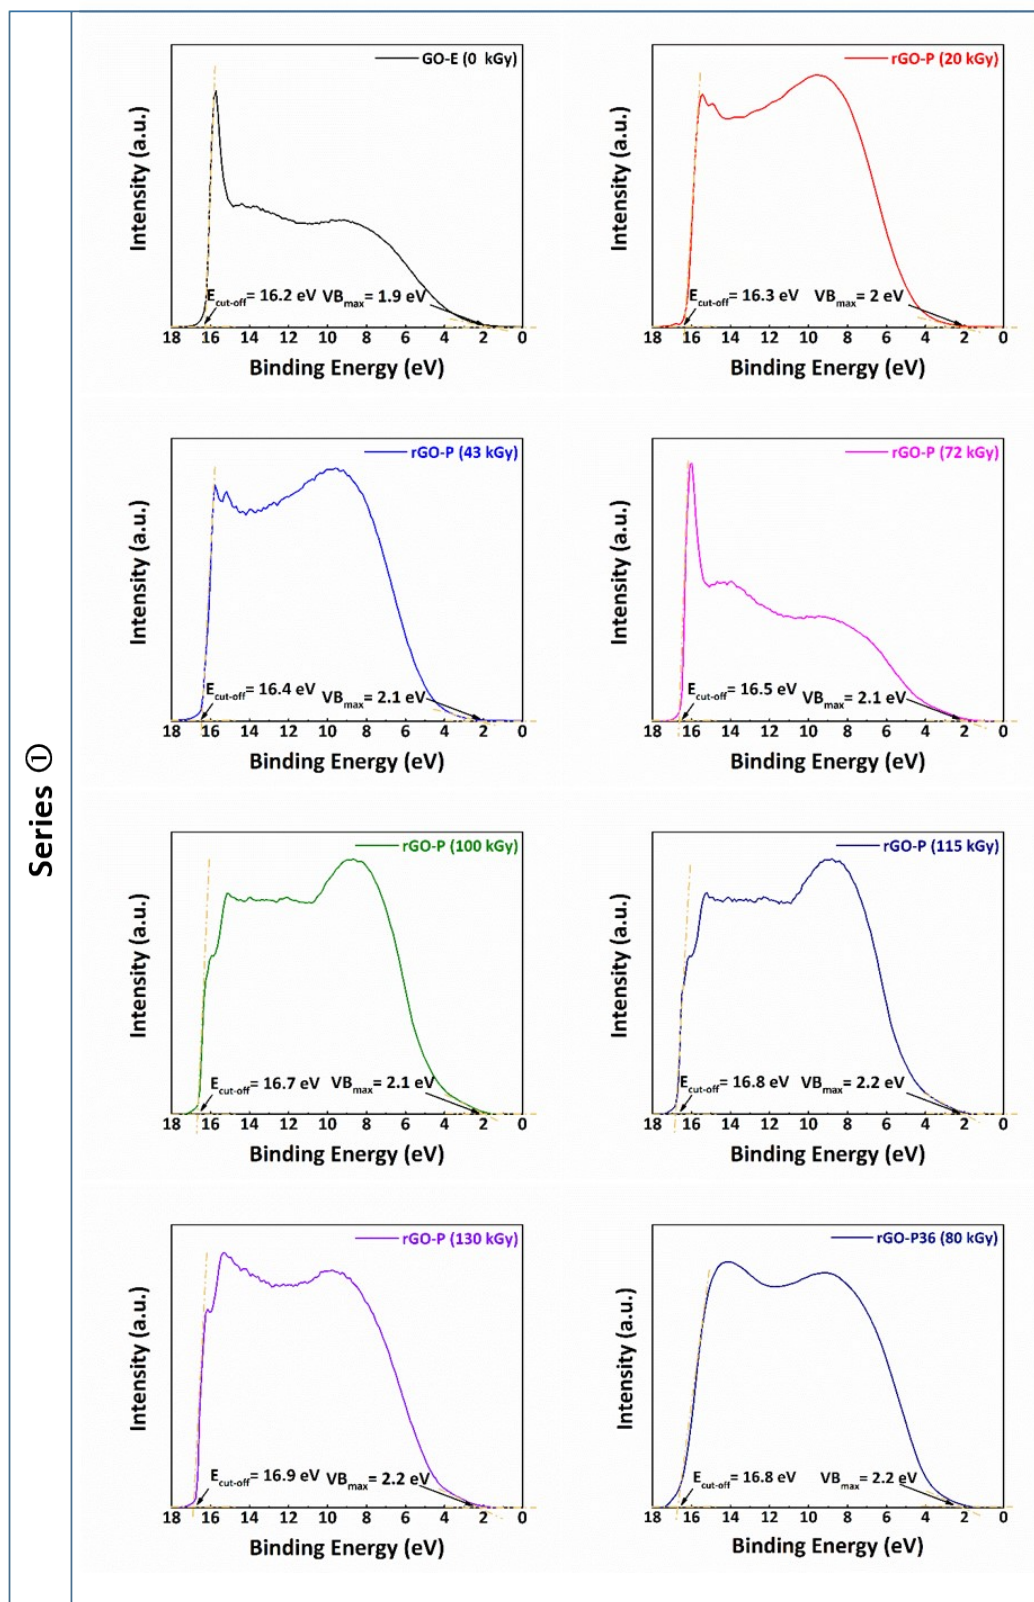

**Figure S4.** Evolution of the UPS spectra recorded with He I radiation for the samples of Series 1 (GO at  $1.42 \text{ g L}^{-1}$  and EDOT at  $10 \text{ mM}$ ) as a function of absorbed dose.

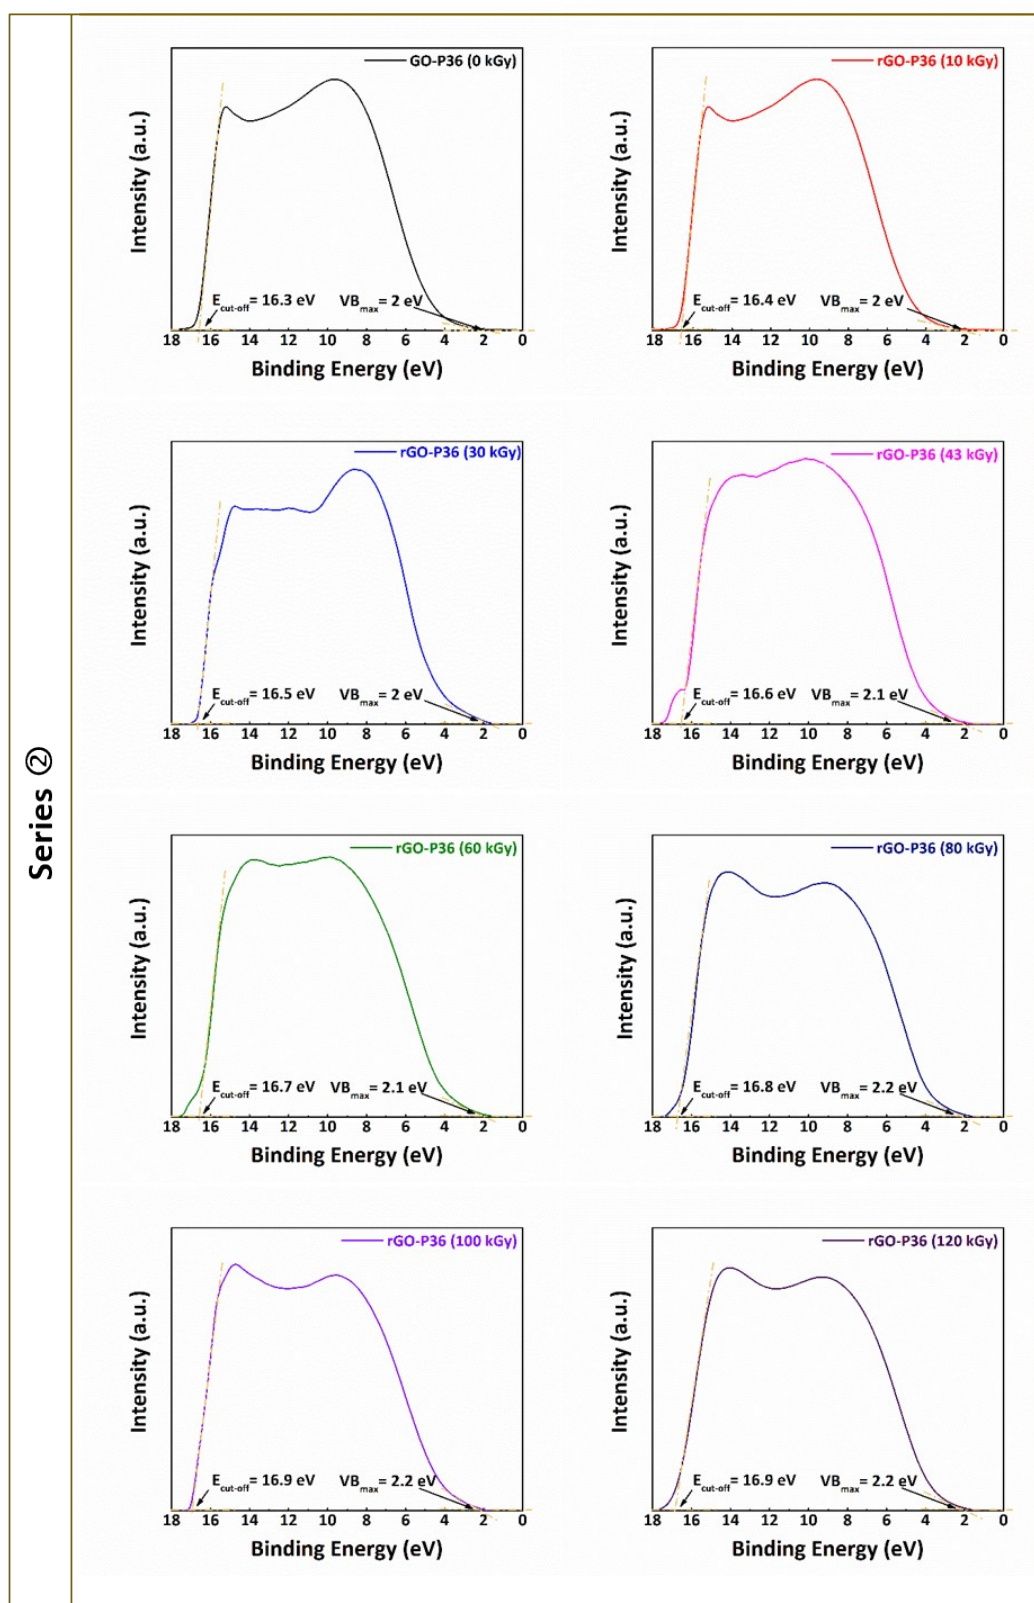

**Figure S5.** Evolution of the UPS spectra recorded with He I radiation for the samples of Series 2 (GO at 1.42 g L<sup>-1</sup> and P36 at 10 mM) as a function of absorbed dose.



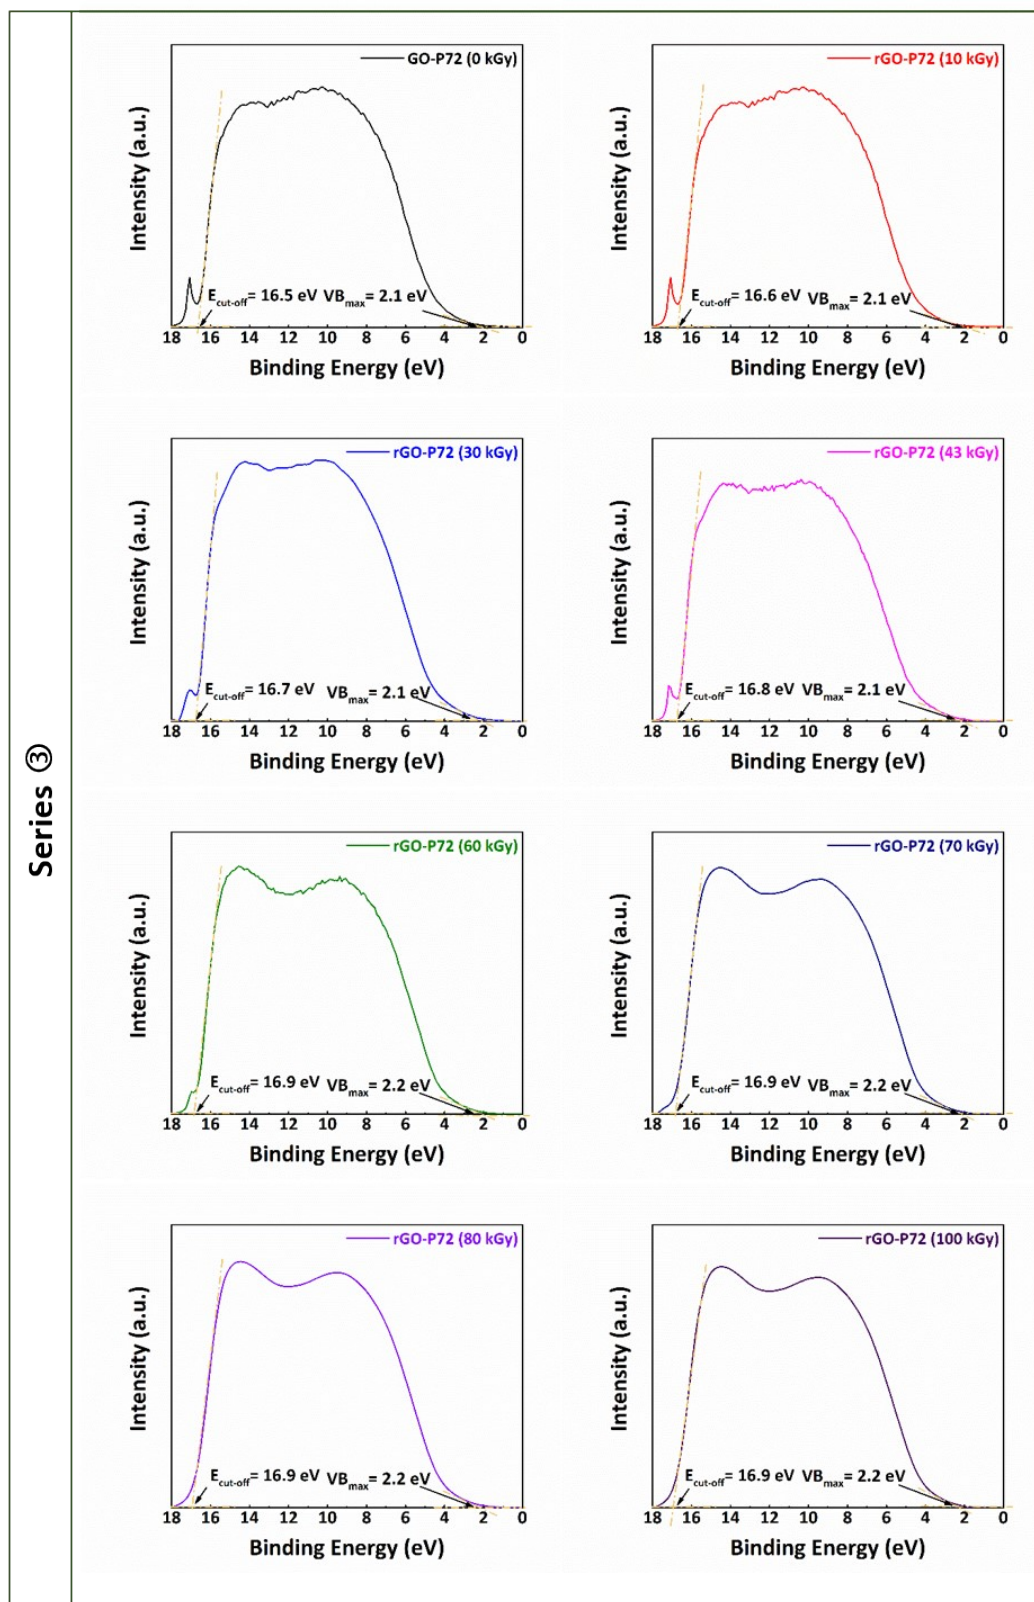

**Figure S6.** Evolution of the UPS spectra recorded with He I radiation for the samples of Series 3 (GO at 1.42 g L<sup>-1</sup> and P72 at 10 mM) as a function of absorbed dose.



**Table S2.** Values used for the calculation of the energy band structure of all samples as a function of absorbed dose for: (a) Series 1 (GO at 1.42 g L<sup>-1</sup> and EDOT at 10 mM), (b) Series 2 (GO at 1.42 g L<sup>-1</sup> and P36 at 10 mM), and (c) Series 3 (GO at 1.42 g L<sup>-1</sup> and P72 at 10 mM). The uncertainty associated with the determined values is less than 5%.

|                   |                     |                        |                           |                           |         |         |         |
|-------------------|---------------------|------------------------|---------------------------|---------------------------|---------|---------|---------|
| a-                | Series①             |                        |                           |                           |         |         |         |
|                   | Sample              | E <sub>g</sub> (eV)    | VB <sub>max</sub> (eV)    | E <sub>cut-off</sub> (eV) | WF (eV) | VB (eV) | CB (eV) |
|                   | GO-E (0 kGy)        | 4.5                    | 1.9                       | 16.2                      | 5       | 6.9     | 2.4     |
|                   | rGO-P (20 kGy)      | 4.5                    | 2                         | 16.3                      | 4.9     | 6.9     | 2.4     |
|                   | rGO-P (43 kGy)      | 4.4                    | 2.1                       | 16.4                      | 4.8     | 6.9     | 2.5     |
|                   | rGO-P (72 kGy)      | 4.1                    | 2.1                       | 16.5                      | 4.7     | 6.8     | 2.7     |
|                   | rGO-P (100 kGy)     | 3.8                    | 2.1                       | 16.7                      | 4.5     | 6.6     | 2.8     |
|                   | rGO-P (115 kGy)     | 3.7                    | 2.2                       | 16.8                      | 4.4     | 6.6     | 2.9     |
|                   | rGO-P (130 kGy)     | 3.6                    | 2.2                       | 16.9                      | 4.3     | 6.5     | 2.9     |
|                   | rGO-P (160 kGy)     | 3.6                    | 2.2                       | 16.9                      | 4.3     | 6.5     | 2.9     |
| Series②           |                     |                        |                           |                           |         |         |         |
| Échantillons      | E <sub>g</sub> (eV) | VB <sub>max</sub> (eV) | E <sub>cut-off</sub> (eV) | WF (eV)                   | VB (eV) | CB (eV) |         |
| GO-P36 (0 kGy)    | 4.2                 | 2                      | 16.3                      | 4.9                       | 6.9     | 2.7     |         |
| rGO-P36 (10 kGy)  | 4.1                 | 2                      | 16.4                      | 4.8                       | 6.8     | 2.7     |         |
| rGO-P36 (30 kGy)  | 4                   | 2                      | 16.5                      | 4.7                       | 6.7     | 2.7     |         |
| rGO-P36 (43 kGy)  | 3.9                 | 2.1                    | 16.6                      | 4.6                       | 6.7     | 2.8     |         |
| rGO-P36 (60 kGy)  | 3.8                 | 2.1                    | 16.7                      | 4.5                       | 6.6     | 2.8     |         |
| rGO-P36 (80 kGy)  | 3.7                 | 2.2                    | 16.8                      | 4.4                       | 6.6     | 2.9     |         |
| rGO-P36 (100 kGy) | 3.6                 | 2.2                    | 16.9                      | 4.3                       | 6.5     | 2.9     |         |
| rGO-P36 (120 kGy) | 3.6                 | 2.2                    | 16.9                      | 4.3                       | 6.5     | 2.9     |         |

| Series③           |            |                 |                    |         |         |         |
|-------------------|------------|-----------------|--------------------|---------|---------|---------|
| Échantillons      | $E_g$ (eV) | $VB_{max}$ (eV) | $E_{cut-off}$ (eV) | WF (eV) | VB (eV) | CB (eV) |
| GP-P72 (0 kGy)    | 4.1        | 2.1             | 16.5               | 4.7     | 6.8     | 2.7     |
| rGO-P72 (10 kGy)  | 3.9        | 2.1             | 16.6               | 4.6     | 6.7     | 2.8     |
| rGO-P72 (30 kGy)  | 3.7        | 2.1             | 16.7               | 4.5     | 6.6     | 2.9     |
| rGO-P72 (43 kGy)  | 3.5        | 2.1             | 16.8               | 4.4     | 6.5     | 3       |
| rGO-P72 (60 kGy)  | 3.5        | 2.2             | 16.9               | 4.3     | 6.5     | 3       |
| rGO-P72 (70 kGy)  | 3.5        | 2.2             | 16.9               | 4.3     | 6.5     | 3       |
| rGO-P72 (80 kGy)  | 3.4        | 2.2             | 16.9               | 4.3     | 6.5     | 3.1     |
| rGO-P72 (100 kGy) | 3.4        | 2.2             | 16.9               | 4.3     | 6.5     | 3.1     |

b-

c-

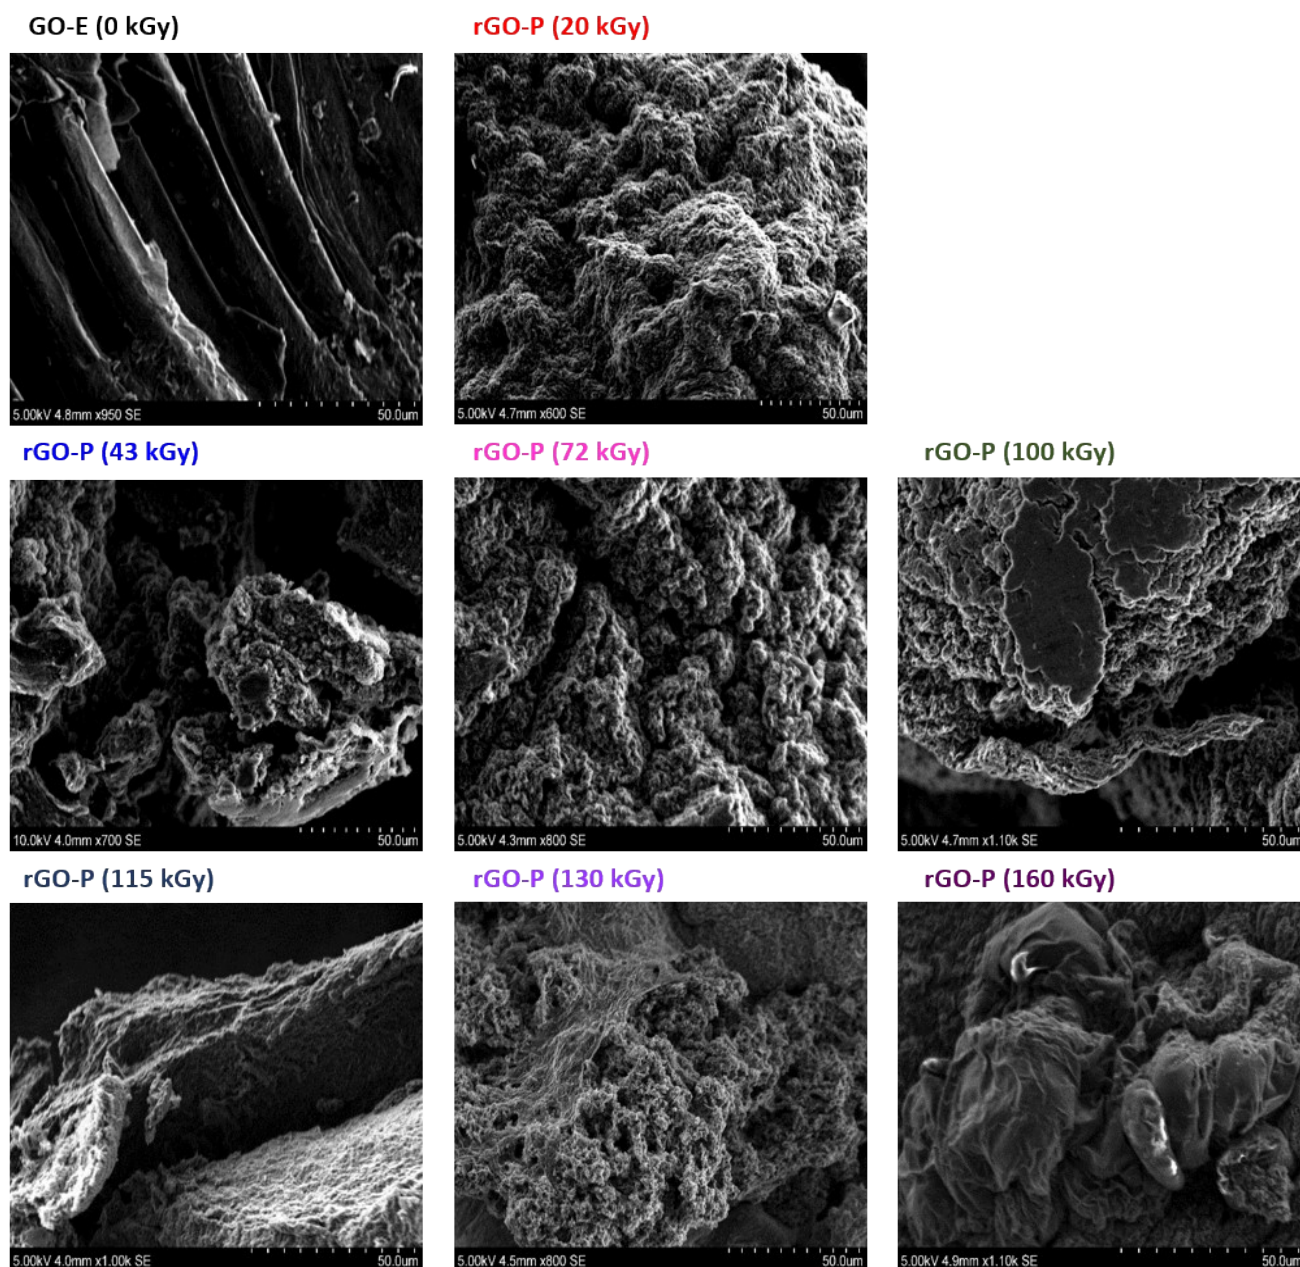

Figure S7. SEM images of the samples from Series 1 (GO at 1.42 g L<sup>-1</sup> and EDOT at 10 mM) as a function of absorbed dose. Scale bar: 50 μm.

GO-P36 (0 kGy)

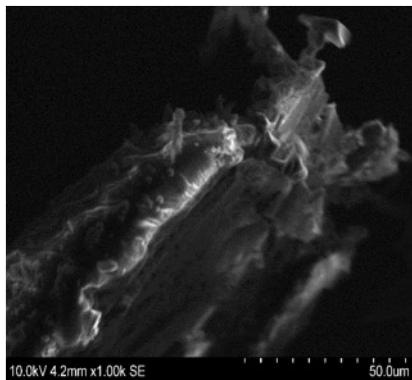

rGO-P36 (10 kGy)

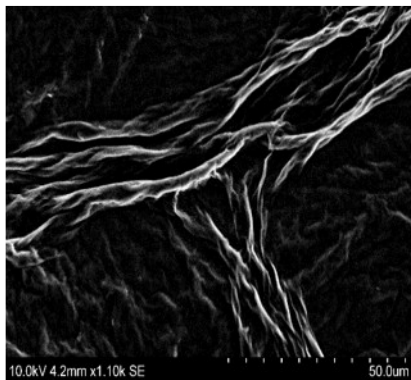

rGO-P36 (30 kGy)

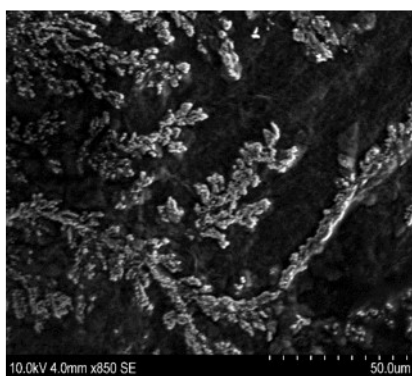

rGO-P36 (43 kGy)

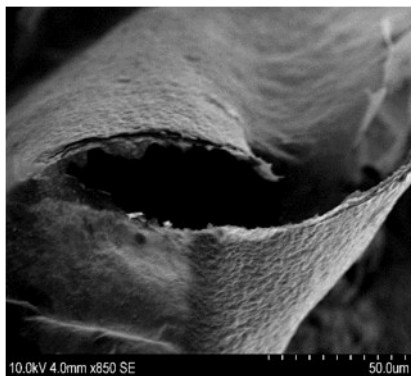

rGO-P36 (60 kGy)

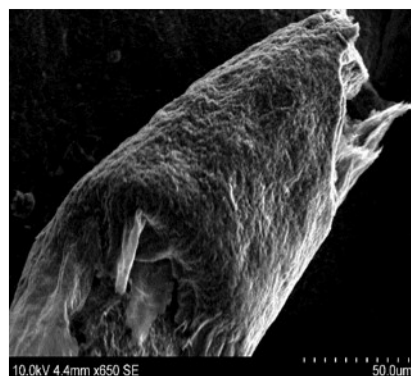

rGO-P36 (80 kGy)

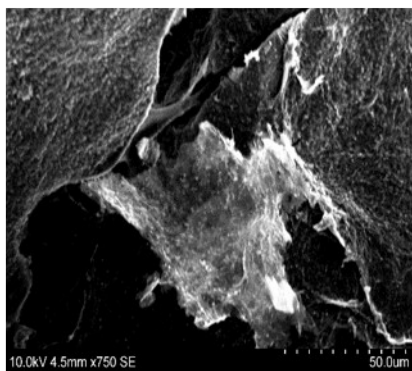

rGO-P36 (100 kGy)

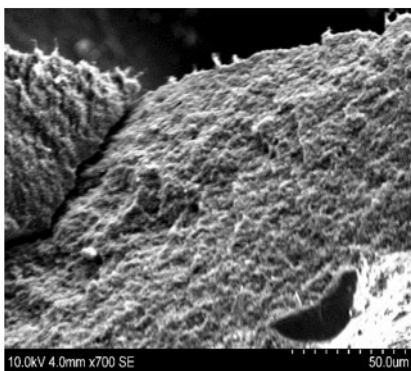

rGO-P36 (120 kGy)

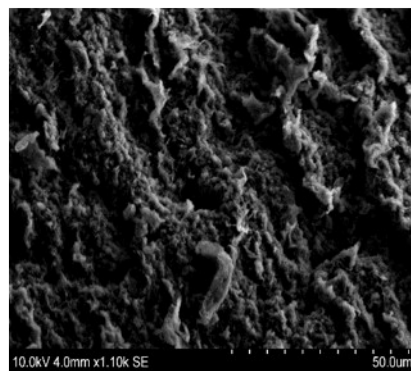

**Figure S8.** SEM images of the samples from Series 2 (GO at 1.42 g L<sup>-1</sup> and P36 at 10 mM) as a function of absorbed dose. Scale bar: 50 μm.



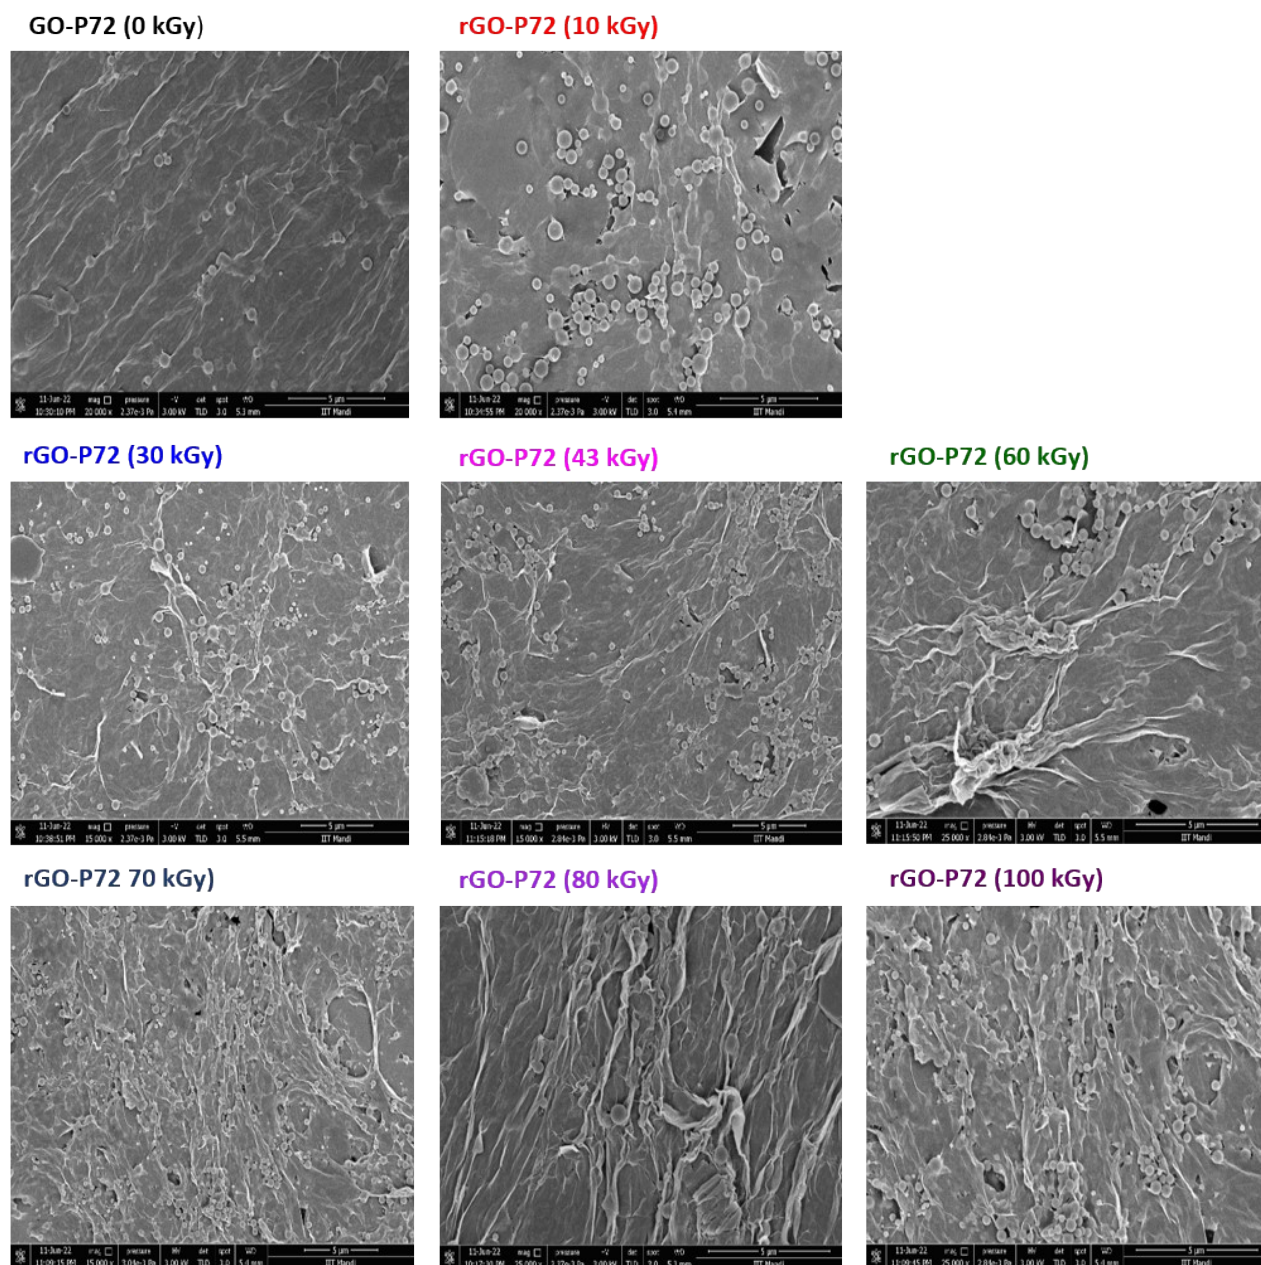

Figure S9. SEM images of the samples from Series 3 (GO at  $1.42 \text{ g L}^{-1}$  and P72 at 10 mM) as a function of absorbed dose. Scale bar: 5  $\mu\text{m}$ .

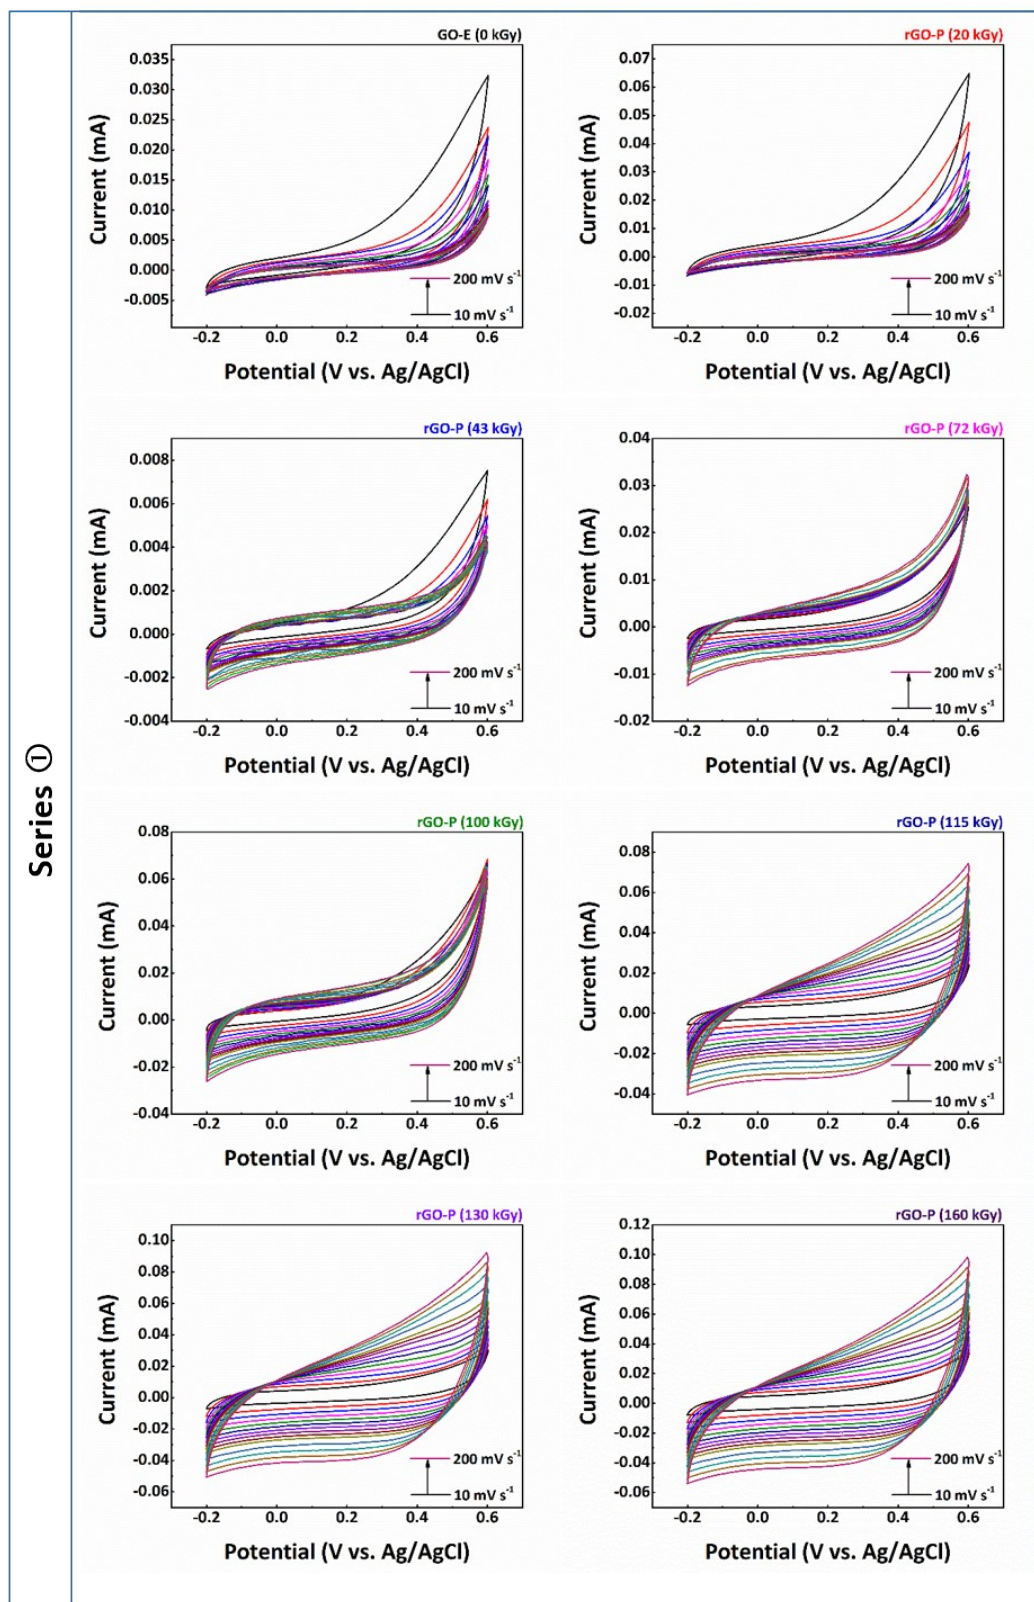

**Figure S10.** Cyclic voltammograms of the samples from Series 1 (GO at 1.42 g L<sup>-1</sup> and EDOT at 10 mM) obtained at various absorbed doses and recorded at different scan rates ranging from 10 to 200 mV s<sup>-1</sup> in a 0.1 M KOH aqueous solution.



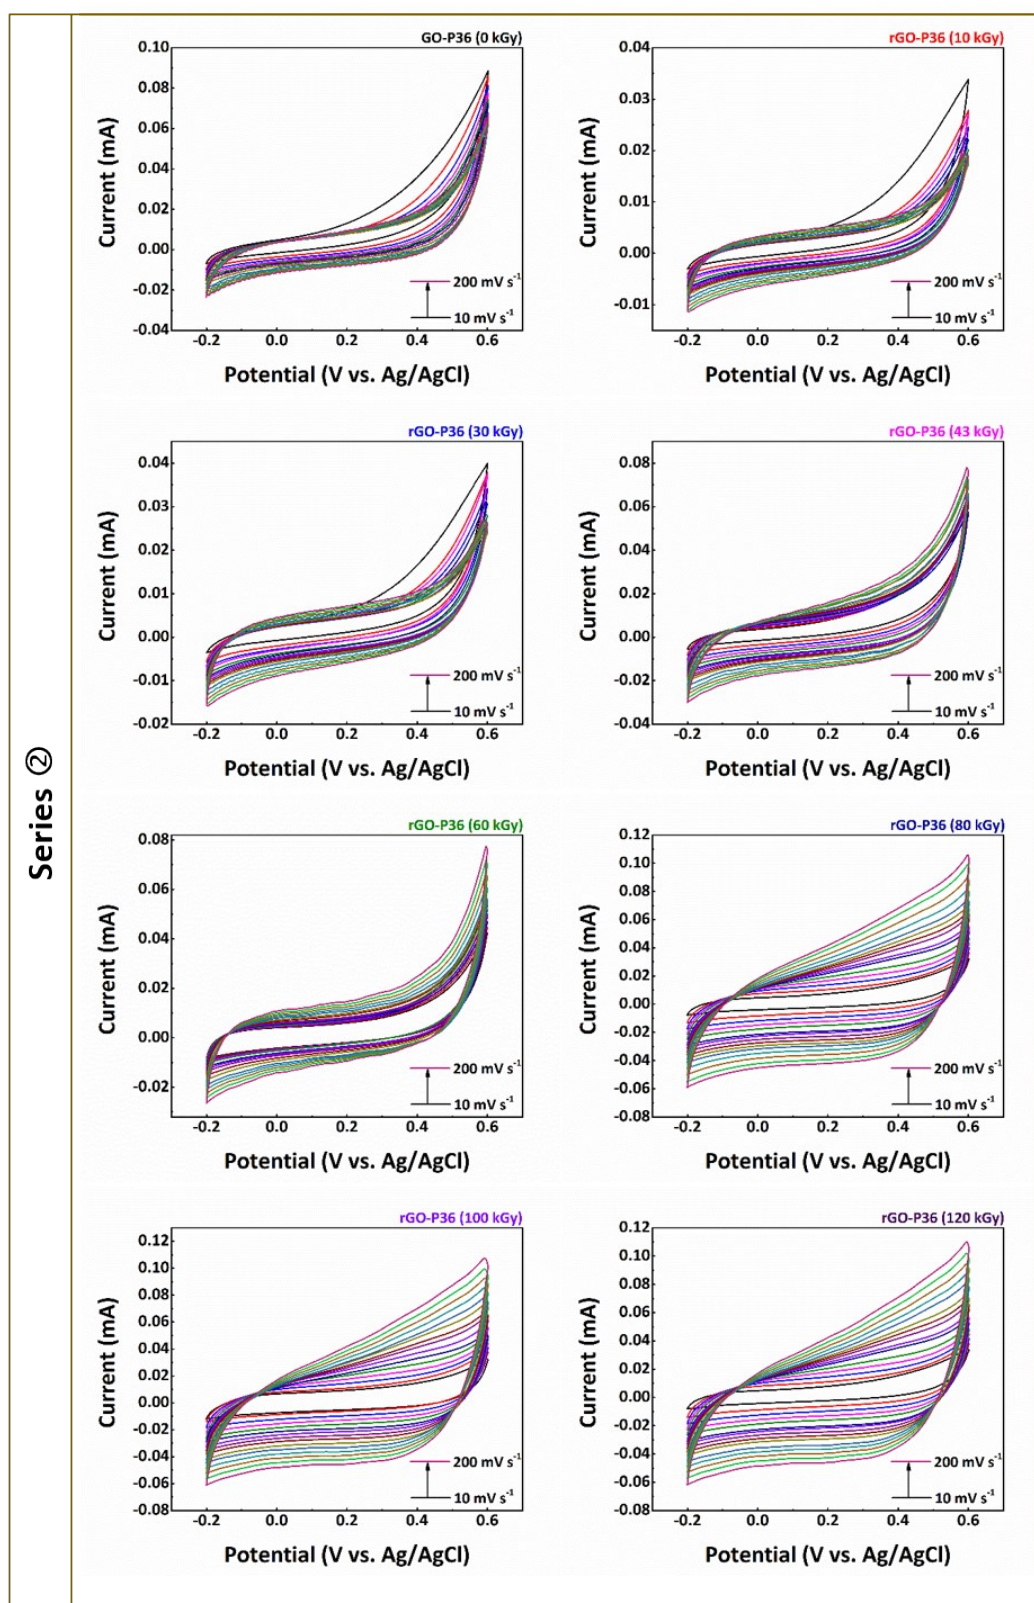

**Figure S11.** Cyclic voltammograms of the samples from Series 2 (GO at  $1.42 \text{ g L}^{-1}$  and P36 at  $10 \text{ mM}$ ) obtained at various absorbed doses and recorded at different scan rates ranging from  $10$  to  $200 \text{ mV s}^{-1}$  in a  $0.1 \text{ M KOH}$  aqueous solution.

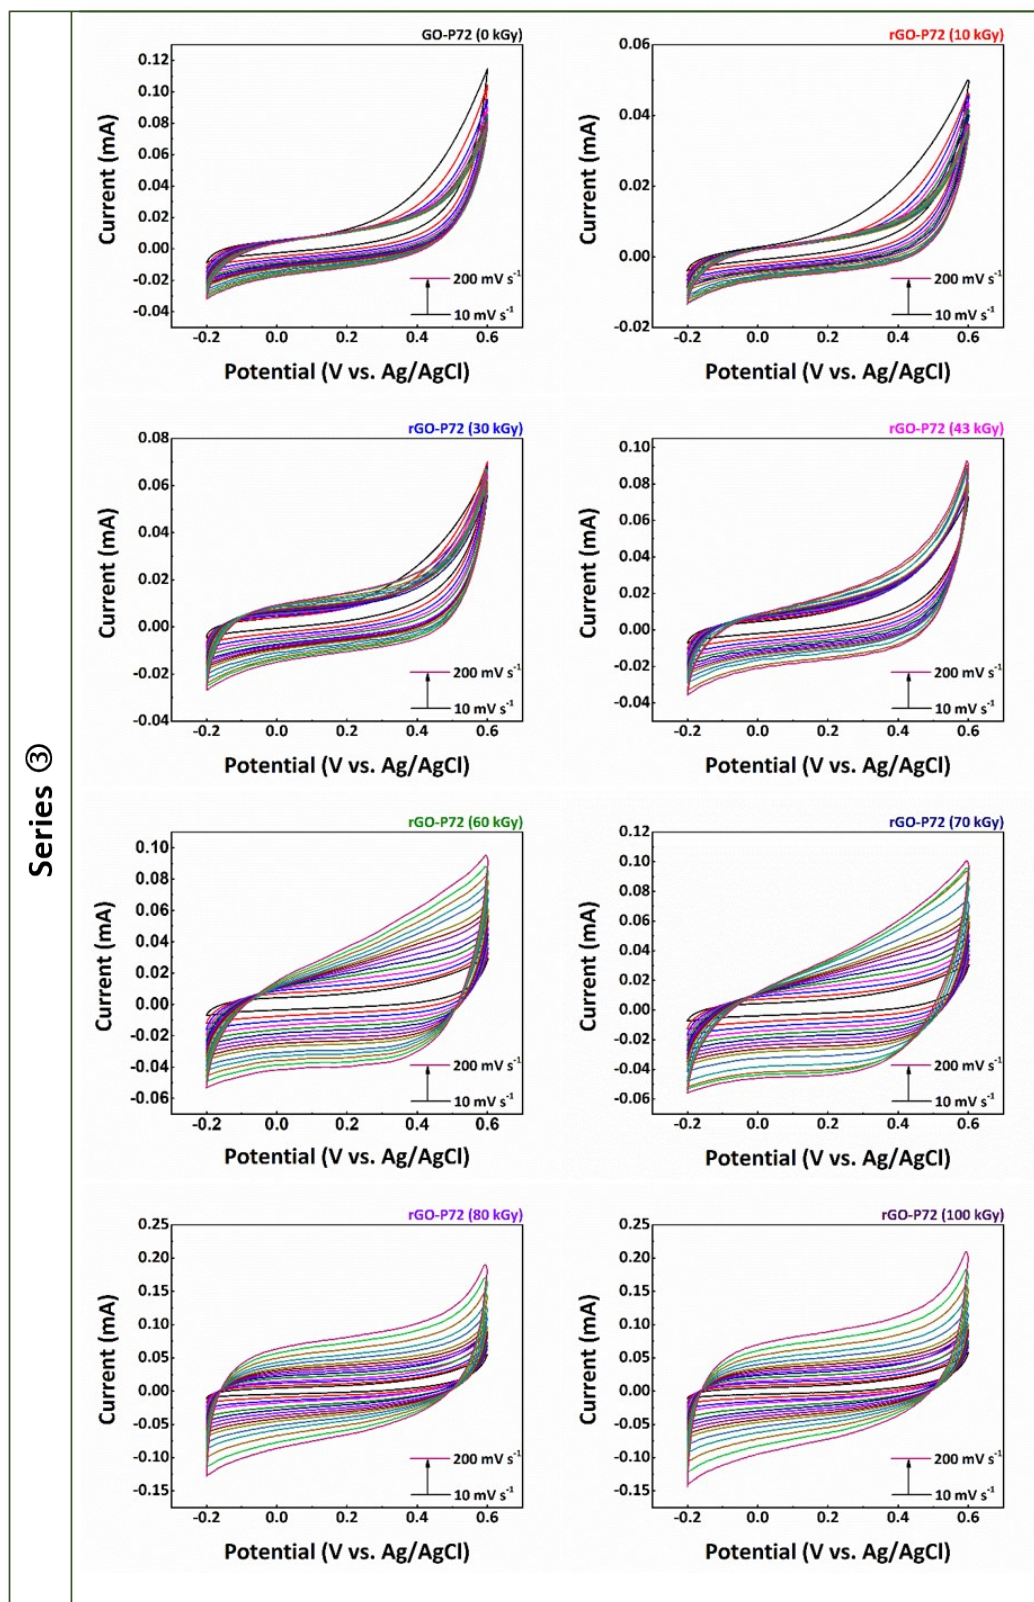

**Figure S12.** Cyclic voltammograms of the samples from Series 3 (GO at 1.42 g L<sup>-1</sup> and P72 at 10 mM) obtained at various absorbed doses and recorded at different scan rates ranging from 10 to 200 mV s<sup>-1</sup> in a 0.1 M KOH aqueous solution.
